# Supplementary material for: Bile Acid Dysregulation Is Intrinsically Related to Cachexia in Tumor-Bearing Mice
Source: MDPI journal article supplement (doi:10.3390/cancers13246389), 2021-12-20
Supplement: s1 [file s1]

# Supplementary Materials: Bile Acid Dysregulation Is Intrinsically Related to Cachexia in Tumor-Bearing Mice

Morgane M. Thibaut, Justine Gillard, Adeline Dolly, Martin Roumain, Isabelle A. Leclercq, Nathalie M. Delzenne, Giulio G. Muccioli and Laure B. Bindels

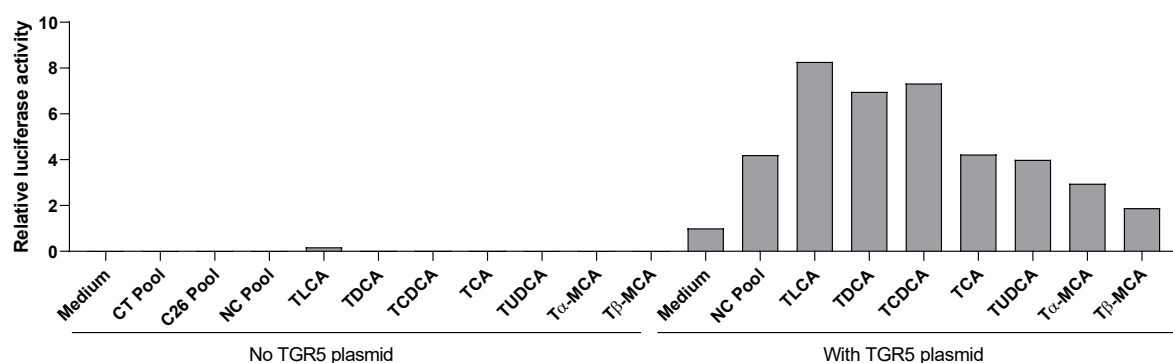

**Figure S1.** TGR5 activation capacity incubated with individual bile acids and mouse portal plasma with or without TGR5 plasmid. TGR5 activation capacity using cell reporter assay incubated with FBS-free medium (Medium) or FBS-free medium containing 10  $\mu$ M of tauro-lithocholic acid (TLCA), tauro-cholic acid (TCA), tauro-chenodeoxycholic acid (TCDCA), tauro- $\alpha$ -muricholic acid (T $\alpha$ -MCA), tauro- $\beta$ -muricholic acid (T $\beta$ -MCA), tauro-deoxycholic acid (TDCA) and tauro-ursodeoxycholic acid (TUDCA) or pool of 10% portal plasma sham-injected mice (CT), mice injected with cachexia-inducing C26 colon carcinoma cells (C26) and mice injected with non-cachexia-inducing C26 colon carcinoma cells (NC) in cells transfected with pGL4.29 and pGL4.73, with or without pCMV-SPORT6 human TGR5 for 3 hours. Each condition was performed in three technical replicates, excepted for NC Pool (in two replicates).

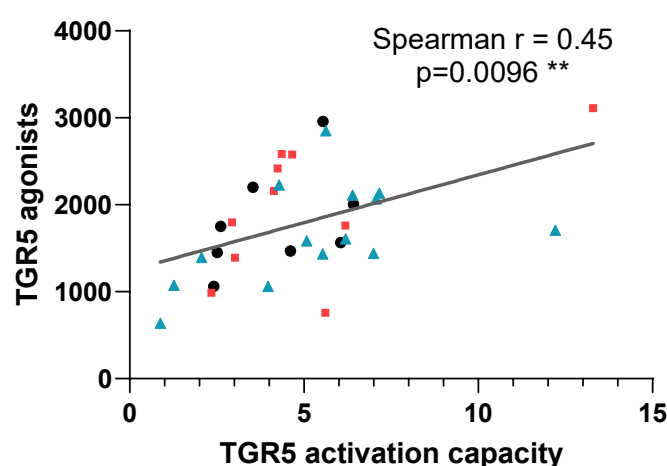

**Figure S2.** Hepatic TGR5 agonist levels correlate with TGR5 activation capacity in mouse portal plasma. Correlation between hepatic TGR5 agonist levels and TGR5 activation capacity in portal plasma of sham-injected mice (CT; black spots;  $n = 8$ ), mice injected with cachexia-inducing C26 colon carcinoma cells (C26 mice; red squares;  $n = 10$ ) and mice injected with non-cachexia-inducing C26 colon carcinoma cells (NC mice; blue triangles;  $n = 14$ ).  $** p < 0.01$ .

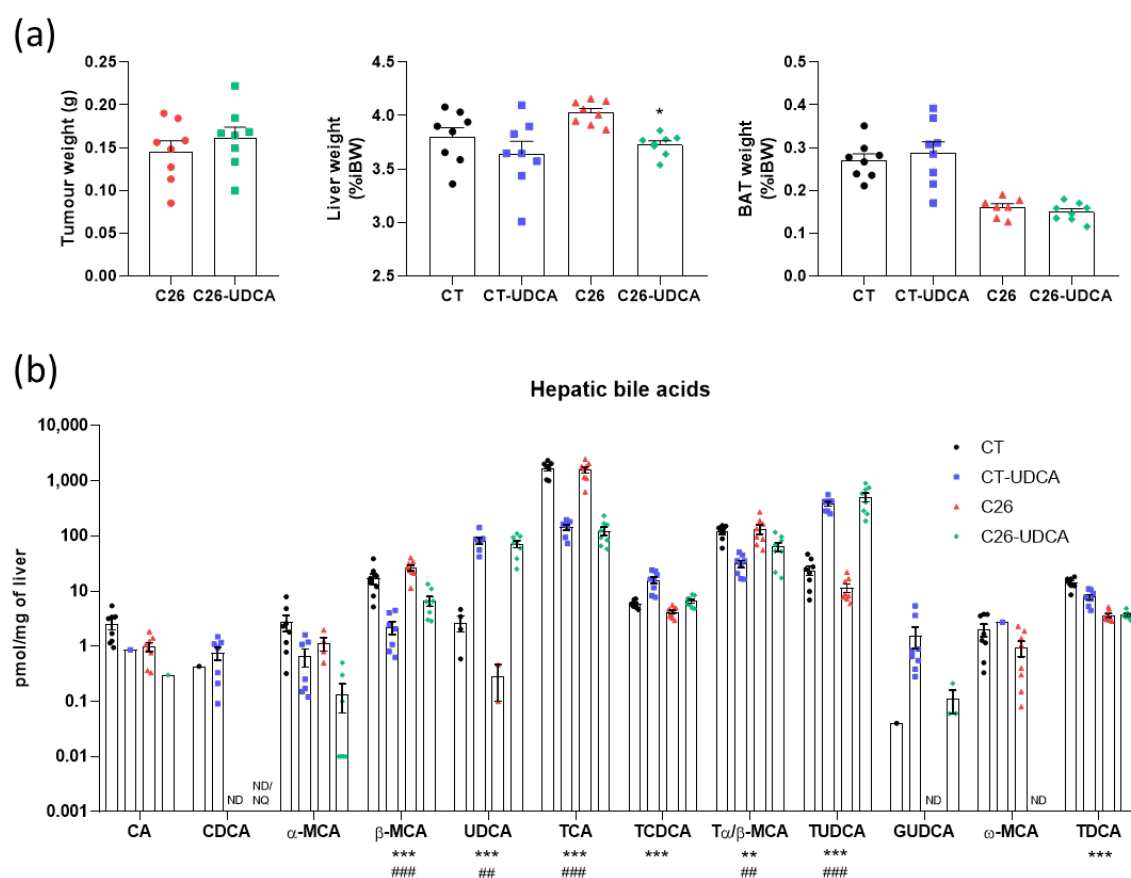

**Figure S3.** Tumor, liver, brown adipose tissue weights and hepatic bile acid profile in cachectic mice treated with ursodeoxycholic acid. **(a)** Tumor, liver and brown adipose tissue weights of sham-injected mice (CT), sham-injected mice treated with UDCA (CT-UDCA), mice injected with cachexia-inducing C26 colon carcinoma cells (C26) and mice injected with cachexia-inducing C26 colon carcinoma cells and treated with UDCA (C26-UDCA). **(b)** Hepatic bile acids in CT, CT-UDCA, C26 and C26-UDCA mice.  $n = 7$ – $8$  mice per group; data are presented as mean  $\pm$  SEM. \*\*  $p < 0.01$ , \*\*\*  $p < 0.001$  CT vs CT-UDCA and #  $p < 0.05$  ##  $p < 0.01$ , ###  $p < 0.001$  C26 vs C26-UDCA. ND, Not detected; NQ, Not quantified.

**Table S1.** The primer sequences for the targeted mouse genes.

| Target name     | Alias/full name                                         | Forward                  | Reverse                  |
|-----------------|---------------------------------------------------------|--------------------------|--------------------------|
| <i>Rpl6</i>     | Ribosomal Protein L6                                    | CTTGTGACTGGCCTCTGT       | GCGTCAGTCAGGTGTTGG       |
| <i>Oaz1</i>     | ornithine decarboxylase antizyme 1                      | TCATCTGCTTCCCAAGAAC      | TGGACCTAGTCCTCCTCAC      |
| <i>Ntcp</i>     | Na(+)/taurocholate transport protein                    | GGACAAGGTGCCCTACAAAG     | ACAGCCACAGAGAGGGAGAA     |
| <i>Oatp1b2</i>  | organic anion transporter family member 1B2             | ATCCCGTGACTAATCCAACA     | ACCAAAGTCTGCTCTATAAACT   |
| <i>Bsep</i>     | bile salt export pump                                   | AGATACAACCGAAGGGGACA     | TCAACTTCTTCCACAAGCACA    |
| <i>Mrp2</i>     | Multidrug resistance-associated protein 2               | GGATGGTGACTGTGGGCTGAT    | GGCTGTTCTCCCTTCTCATGG    |
| <i>Ostβ</i>     | Organic solute transporter subunit beta                 | GTATTTTCGTGCAGAAGATGCG   | TTTCTGTTGCCAGGATGCTC     |
| <i>Cyp7a1</i>   | cytochrome P450 family 7 subfamily A member 1           | GGGATTGCTGTGGTAGTGAGC    | GGTATGGAATCAACCCGTTGTC   |
| <i>Cyp8b1</i>   | cytochrome P450 family 8 subfamily B member 1           | GATCCGTCGCGGAGATAAGG     | CGGGTTGAGGAACCGATCAT     |
| <i>Cyp27a1</i>  | cytochrome P450 family 27 subfamily A member 1          | TCTGGCTACCTGCACTTCCT     | GTGTGTTGGATGTCGTGTCC     |
| <i>Dio2</i>     | iodothyronine deiodinase 2                              | AATTATGCCTCGGAGAAGACCG   | GGCAGTTGCCTAGTGAAAGGT    |
| <i>Ucp1</i>     | uncoupling protein 1                                    | GCTACACGGGGACCTACAATG    | CGTCATCTGCCAGTATTTTGT    |
| <i>Acox1</i>    | acyl-CoA oxidase 1                                      | CTATGGGATCAGCCAGAAAGG    | AGTCAAAGGCATCCACCAAAG    |
| <i>Cidea</i>    | cell death inducing DFFA like effector a                | TGGAAGAGGGACAGAAATGG     | TCTCGTACATCGTGGCTTTG     |
| <i>Gk</i>       | glycerol kinase                                         | TTTGTTCCTCAAACCCGAGAG    | AGCGCCTAGTGCAGTTGTTT     |
| <i>Il1β</i>     | interleukin-1β                                          | TCGCTCAGGGTACAAGAAA      | CATCAGAGGCAAGGAGGAAAAC   |
| <i>Ccl2</i>     | C-C motif chemokine ligand 2                            | GCAGTTAAGCCCCACTCA       | TCCAGCCTACTCATTTGGGATCA  |
| <i>Cxcl1</i>    | C-X-C motif chemokine ligand 1                          | AAACCGAAGTCATAGCCACAC    | AAGCCAGCGTTTACCAGA       |
| <i>Cxcl2</i>    | C-X-C motif chemokine ligand 2                          | CGCCCAGACAGAAGTCATAG     | CTCCTCCTTCCAGGTCAGTT     |
| <i>Icam1</i>    | intercellular adhesion molecule 1                       | GAGAGTGGACCCAACTGGAA     | CACACTCTCCGGAACGAA       |
| <i>Mmp8</i>     | matrix metalloproteinase 8                              | CCTTCTACCCAACGGTCTT      | GCCCAGTACTGTCTGCCTTT     |
| <i>Vcam1</i>    | vascular cell adhesion molecule 1                       | GAACCCAAACAGAGGCAGAG     | CCATCACTTGAGCAGGTCAG     |
| <i>Nlrp3</i>    | NLR family pyrin domain containing 3                    | GCCCAAGGAGGAAGAAGAAG     | AGAAGAGACCACGGCAGAAG     |
| <i>Trim63</i>   | Tripartite Motif Containing 63                          | ACGAGAAGAAGAGCGAGC       | CTTGGCACTTGAGAGGAA       |
| <i>Fbxo32</i>   | F-Box Protein 32                                        | ATGCACACTGGTGCAGAGAG     | TGTAAGCACACAGGCAGGTC     |
| <i>Musa1</i>    | muscle ubiquitin ligase of the SCF complex in atrophy 1 | TTCTTGACGGCTTCAGTTT      | TGAATCGCCATACCTTCTCTTT   |
| <i>Map1lc3a</i> | Microtubule Associated Protein 1 Light Chain 3 Alpha    | CACTGCTCTGTCTTGTGTAGGTTG | TCGTGTGCCCTTTATTAGTGCATC |
| <i>Ctsl</i>     | Cathepsin L                                             | GTGGACTGTTCTACGCTCAAG    | TCCGTCTTCGCTTCATAGG      |
| <i>MyoG</i>     | myogenin                                                | CAGTGAATGCAACTCCACAC     | GGCAACAGACATATCCTCCA     |
| <i>MyoD</i>     | myogenic differentiation 1                              | TCCCTAAGCGACACAGAACA     | CGAAAGGACAGTTGGGAAGA     |
| <i>Ucp2</i>     | uncoupling protein 2                                    | GGTCGGAGATACCAGAGCAC     | TGAGGTTGGCTTTCAGGAGA     |
| <i>Pax7</i>     | paired box 7                                            | AAAGCCAAACACAGCATCG      | GTCGGGTTCTGATTCCACAT     |
| <i>Igfl</i>     | insulin like growth factor 1                            | GCTCTTCAGTTCGTGTGTGG     | CACAATGCCTGTCTGAGGTG     |
| <i>Ppargc1a</i> | PPARG coactivator 1 alpha                               | AGCCGTGACCACTGACAACGAG   | GCTGCATGGTCTGAGTGCTAAG   |
